# Supplementary material for: Inhibition of the Growth of Botrytis cinerea by Penicillium chrysogenum VKM F-4876D Combined with Fludioxonil-, Difenoconazole-, or Tebuconazole-Based Fungicides
Source: MDPI journal article supplement (doi:10.3390/agronomy13102602), 2023-10-12
Supplement: s1 [file s1]

4-merge 1388bp

TGAACCTGCGGAAGGATCATTACAGAGTTCATGCCCCGAAAGGGTAGACCTCCCACCCTTGTGTATTATTACTTTGT  
TGCTTTGGCGAGCTGCCTCCGGGCCTTGATGCTCGCCAGAGAATACCAAACTCTTTTTATTAATGTCGTCTGAGT  
ACTATATAATAGTTAAAACTTTCAACAACGGATCTCTTGGTTCTGGCATCGATGAAGAACGCAGCGAAATGCGATA  
AGTAATGTGAATTGCAGAATTCAGTGAATCATCGAATCTTTGAACGCACATTGCGCCCCCTTGGTATTCCGGGGGGC  
ATGCCTGTTTCGAGCGTCATTTCAACCCTCAAGCTTAGCTTGGTATTGAGTCTATGTCAGTAATGGCAGGCTCTAAAA  
TCAGTGGCGGCGCCGCTGGGTCCTGAACGTAGTAATATCTCTCGTTACAGGTTCTCGGTGTGCTTCTGCCAAAACC  
CAAATTTTTCTATGGTTGACCTCGGATCAGGTAGGGATACCCGCTGAACTTAAGCATATCAATAAGCGGAGGAAA  
AGAAACCAACAGGGATTACCTCAGTAACGGCGAGTGAAGCGGTAAAAGCTCAAATTTGAAATCTGGCTCTTTTAG  
AGTCCGAATTGTAATTTGTAGAAGATGCTTCGGGTGTGGTTCCGGTCTAAGTTCCTTGGAACAGGACGTCATAGA  
GGGTGAGAATCCCGTATGTGACTGGATACCTATGCTCATGTGAAGCTCTTCGACGAGTCGAGTTGTTTGGGAAT  
GCAGCTCAAAATGGGAGGTATATTTCTTCTAAAGCTAAATATTGGCCAGAGACCGATAGCGCACAAAGTAGAGTGA  
TCGAAAGATGAAAAGCACTTTGAAAAGAGAGTTAAACAGTACGTGAAATTGTTGAAAGGGAAGCGCTTGCAATC  
AGACTTGCACTTGGTGTTCATCAGGGTCTCGTACCCTGTGTACTTCATCAAGTTCAGGCCAGCATCAGTTTGAGTG  
GTTAGATAAAGGCTTAGAGAATGTGGCCCTCTTCGGGGGGTGTATAGCTCTAGGTGCAATGTAGCCTACTTGGA  
CTGAGGACCGCGCTTCGGCTAGGATGCTGGCGTAATGGTTGTAAGCGACCCGTCTTGAAACACGGACCAAGGAGT  
GTACCTAATATGCGAGTGTTTGGGTGTTAAACCCATACGCGTAATGAAAGTGAACGCTGGTGAGAACCCTTAAGG  
GTGCATCATCGACCGATCTTGATGTCTTCGGATGGATTTGAGTAAGAGCATATTGGGTGCGACCCGAAAGATGGT  
GATCTATACGTGAATAGGGTGAAGCCAGAGGAACTCTGGTGGAGGCTCGCAGCGGTTCTGACGTGCAAATCGA  
TCGTCAAATTTGCGTATAGGGCGAAAGACTA

**Figure S1.** Nucleotide sequence of the fragment of a 28S RNA gene from *Botrytis cinerea* determined using the ITS5-LR5 primer system.
